# Supplementary material for: Sleep and Anabolic/Catabolic Hormonal Profile in Sedentary Middle-Aged Adults: The FIT-AGEING Study
Source: MDPI journal article supplement (doi:10.3390/ijms232314709), 2022-11-25
Supplement: s1 [file s1]

## SUPPLEMENTARY MATERIAL

**Table S1.** Association of sleep quantity and quality with DHEAS, free testosterone, somatotropin, and cortisol (Model 0) adjusted by age (Model 1), by fat mass index (Model 2), and by lean mass index (Model 3).

|                               | All     |       |              | Men     |       |       | Women   |       |              |
|-------------------------------|---------|-------|--------------|---------|-------|-------|---------|-------|--------------|
|                               | $\beta$ | $R^2$ | $p$          | $\beta$ | $R^2$ | $p$   | $\beta$ | $R^2$ | $p$          |
| <b>Global PSQI score</b>      |         |       |              |         |       |       |         |       |              |
| DHEAS ( $\mu\text{g/dL}$ )    |         |       |              |         |       |       |         |       |              |
| Model 0                       | -0.300  | 0.090 | <b>0.015</b> | -0.195  | 0.038 | 0.301 | -0.281  | 0.079 | 0.097        |
| Model 1                       | -0.241  | 0.165 | <b>0.045</b> | -0.014  | 0.258 | 0.939 | -0.231  | 0.163 | 0.163        |
| Model 2                       | -0.289  | 0.097 | <b>0.020</b> | -0.195  | 0.038 | 0.312 | -0.276  | 0.081 | 0.109        |
| Model 3                       | -0.116  | 0.233 | 0.350        | 0.024   | 0.138 | 0.912 | -0.191  | 0.158 | 0.264        |
| Free Testosterone (ng/dL)     |         |       |              |         |       |       |         |       |              |
| Model 0                       | -0.249  | 0.062 | <b>0.044</b> | -0.144  | 0.021 | 0.449 | -0.109  | 0.012 | 0.527        |
| Model 1                       | -0.281  | 0.085 | <b>0.026</b> | -0.146  | 0.021 | 0.482 | -0.105  | 0.012 | 0.552        |
| Model 2                       | -0.216  | 0.125 | 0.073        | -0.137  | 0.031 | 0.476 | -0.090  | 0.053 | 0.602        |
| Model 3                       | 0.055   | 0.452 | 0.598        | 0.144   | 0.192 | 0.501 | -0.142  | 0.023 | 0.436        |
| Somatotropin (ng/mL)          |         |       |              |         |       |       |         |       |              |
| Model 0                       | 0.081   | 0.007 | 0.517        | 0.122   | 0.015 | 0.521 | -0.035  | 0.001 | 0.840        |
| Model 1                       | 0.079   | 0.007 | 0.543        | -0.009  | 0.129 | 0.965 | -0.024  | 0.005 | 0.891        |
| Model 2                       | 0.117   | 0.084 | 0.339        | 0.137   | 0.073 | 0.467 | 0.009   | 0.211 | 0.952        |
| Model 3                       | -0.051  | 0.080 | 0.706        | 0.027   | 0.034 | 0.907 | -0.048  | 0.003 | 0.796        |
| Cortisol ( $\mu\text{g/dL}$ ) |         |       |              |         |       |       |         |       |              |
| Model 0                       | -0.308  | 0.095 | <b>0.012</b> | -0.227  | 0.052 | 0.227 | -0.339  | 0.115 | <b>0.043</b> |
| Model 1                       | -0.355  | 0.144 | <b>0.004</b> | -0.336  | 0.131 | 0.092 | -0.365  | 0.138 | <b>0.033</b> |
| Model 2                       | -0.301  | 0.098 | <b>0.015</b> | -0.215  | 0.089 | 0.252 | -0.351  | 0.130 | <b>0.039</b> |
| Model 3                       | -0.295  | 0.096 | <b>0.030</b> | -0.280  | 0.058 | 0.228 | -0.346  | 0.116 | 0.053        |
| <b>Total sleep time</b>       |         |       |              |         |       |       |         |       |              |
| DHEAS ( $\mu\text{g/dL}$ )    |         |       |              |         |       |       |         |       |              |
| Model 0                       | -0.176  | 0.031 | 0.145        | 0.100   | 0.010 | 0.580 | -0.150  | 0.022 | 0.377        |
| Model 1                       | -0.200  | 0.136 | 0.084        | 0.109   | 0.221 | 0.502 | -0.167  | 0.132 | 0.303        |
| Model 2                       | -0.168  | 0.041 | 0.166        | 0.107   | 0.012 | 0.565 | -0.163  | 0.031 | 0.347        |
| Model 3                       | 0.016   | 0.264 | 0.886        | 0.125   | 0.196 | 0.450 | -0.116  | 0.138 | 0.475        |
| Free testosterone (ng/dL)     |         |       |              |         |       |       |         |       |              |
| Model 0                       | -0.328  | 0.108 | <b>0.006</b> | -0.145  | 0.021 | 0.421 | 0.232   | 0.054 | 0.167        |
| Model 1                       | -0.326  | 0.109 | <b>0.006</b> | -0.143  | 0.033 | 0.433 | 0.231   | 0.055 | 0.176        |
| Model 2                       | -0.307  | 0.175 | <b>0.008</b> | -0.108  | 0.090 | 0.543 | 0.212   | 0.075 | 0.212        |
| Model 3                       | -0.098  | 0.442 | 0.324        | -0.124  | 0.151 | 0.469 | 0.228   | 0.055 | 0.182        |
| Somatotropin (ng/mL)          |         |       |              |         |       |       |         |       |              |
| Model 0                       | 0.280   | 0.078 | <b>0.019</b> | 0.040   | 0.002 | 0.825 | 0.172   | 0.029 | 0.310        |
| Model 1                       | 0.277   | 0.080 | <b>0.021</b> | 0.034   | 0.083 | 0.847 | 0.169   | 0.032 | 0.324        |
| Model 2                       | 0.295   | 0.114 | <b>0.013</b> | 0.032   | 0.005 | 0.863 | 0.118   | 0.174 | 0.459        |
| Model 3                       | 0.181   | 0.139 | 0.143        | 0.029   | 0.037 | 0.874 | 0.171   | 0.030 | 0.321        |
| Cortisol ( $\mu\text{g/dL}$ ) |         |       |              |         |       |       |         |       |              |
| Model 0                       | -0.094  | 0.009 | 0.438        | 0.103   | 0.011 | 0.570 | -0.204  | 0.042 | 0.226        |
| Model 1                       | -0.082  | 0.039 | 0.499        | 0.098   | 0.063 | 0.584 | -0.199  | 0.049 | 0.242        |
| Model 2                       | -0.086  | 0.018 | 0.481        | 0.134   | 0.060 | 0.460 | -0.200  | 0.042 | 0.246        |
| Model 3                       | -0.050  | 0.021 | 0.703        | 0.105   | 0.012 | 0.567 | -0.198  | 0.045 | 0.248        |
| <b>Wake after sleep onset</b> |         |       |              |         |       |       |         |       |              |
| DHEAS ( $\mu\text{g/dL}$ )    |         |       |              |         |       |       |         |       |              |
| Model 0                       | 0.076   | 0.006 | 0.533        | 0.039   | 0.002 | 0.830 | 0.068   | 0.005 | 0.688        |
| Model 1                       | 0.083   | 0.103 | 0.476        | -0.052  | 0.212 | 0.756 | 0.175   | 0.132 | 0.302        |
| Model 2                       | 0.060   | 0.017 | 0.625        | 0.032   | 0.002 | 0.868 | 0.073   | 0.010 | 0.672        |
| Model 3                       | 0.018   | 0.264 | 0.866        | -0.038  | 0.182 | 0.820 | 0.090   | 0.133 | 0.579        |
| Free Testosterone (ng/dL)     |         |       |              |         |       |       |         |       |              |
| Model 0                       | 0.062   | 0.004 | 0.608        | 0.104   | 0.011 | 0.563 | -0.168  | 0.028 | 0.320        |
| Model 1                       | 0.061   | 0.007 | 0.617        | 0.086   | 0.020 | 0.645 | -0.172  | 0.028 | 0.337        |
| Model 2                       | 0.021   | 0.082 | 0.862        | 0.028   | 0.079 | 0.880 | -0.158  | 0.056 | 0.351        |
| Model 3                       | -0.012  | 0.433 | 0.896        | 0.040   | 0.138 | 0.820 | -0.172  | 0.033 | 0.314        |
| Somatotropin (ng/mL)          |         |       |              |         |       |       |         |       |              |
| Model 0                       | -0.103  | 0.011 | 0.397        | 0.012   | 0.000 | 0.948 | -0.137  | 0.019 | 0.418        |
| Model 1                       | -0.101  | 0.014 | 0.406        | 0.070   | 0.086 | 0.698 | -0.131  | 0.019 | 0.465        |
| Model 2                       | -0.130  | 0.044 | 0.285        | 0.032   | 0.005 | 0.869 | -0.113  | 0.173 | 0.475        |
| Model 3                       | -0.066  | 0.115 | 0.570        | 0.047   | 0.039 | 0.796 | -0.139  | 0.020 | 0.419        |

|                           |        |       |       |        |       |       |        |       |              |
|---------------------------|--------|-------|-------|--------|-------|-------|--------|-------|--------------|
| Cortisol (µg/dL)          |        |       |       |        |       |       |        |       |              |
| Model 0                   | 0.015  | 0.000 | 0.899 | −0.249 | 0.062 | 0.162 | 0.393  | 0.154 | <b>0.016</b> |
| Model 1                   | 0.011  | 0.032 | 0.926 | −0.212 | 0.097 | 0.239 | 0.398  | 0.155 | <b>0.021</b> |
| Model 2                   | 0.000  | 0.011 | 0.999 | −0.334 | 0.145 | 0.067 | 0.391  | 0.155 | <b>0.018</b> |
| Model 3                   | 0.000  | 0.019 | 0.999 | −0.264 | 0.069 | 0.150 | 0.399  | 0.165 | <b>0.016</b> |
| <b>Sleep efficiency</b>   |        |       |       |        |       |       |        |       |              |
| DHEAS (µg/dL)             |        |       |       |        |       |       |        |       |              |
| Model 0                   | −0.106 | 0.011 | 0.382 | −0.005 | 0.000 | 0.978 | −0.099 | 0.010 | 0.560        |
| Model 1                   | −0.114 | 0.110 | 0.328 | 0.072  | 0.215 | 0.664 | −0.184 | 0.136 | 0.269        |
| Model 2                   | −0.090 | 0.021 | 0.467 | 0.005  | 0.001 | 0.981 | −0.104 | 0.016 | 0.545        |
| Model 3                   | −0.002 | 0.263 | 0.985 | 0.070  | 0.185 | 0.677 | −0.106 | 0.136 | 0.512        |
| Free Testosterone (ng/dL) |        |       |       |        |       |       |        |       |              |
| Model 0                   | −0.152 | 0.023 | 0.208 | −0.128 | 0.016 | 0.477 | 0.203  | 0.041 | 0.229        |
| Model 1                   | −0.151 | 0.026 | 0.215 | −0.113 | 0.025 | 0.542 | 0.205  | 0.041 | 0.243        |
| Model 2                   | −0.108 | 0.093 | 0.363 | −0.055 | 0.081 | 0.764 | 0.191  | 0.067 | 0.257        |
| Model 3                   | −0.020 | 0.434 | 0.836 | −0.067 | 0.140 | 0.701 | 0.204  | 0.045 | 0.232        |
| Somatotropin (ng/mL)      |        |       |       |        |       |       |        |       |              |
| Model 0                   | 0.156  | 0.024 | 0.198 | −0.012 | 0.000 | 0.947 | 0.164  | 0.027 | 0.332        |
| Model 1                   | 0.154  | 0.028 | 0.205 | −0.061 | 0.085 | 0.734 | 0.159  | 0.027 | 0.368        |
| Model 2                   | 0.188  | 0.062 | 0.121 | −0.032 | 0.005 | 0.869 | 0.137  | 0.179 | 0.387        |
| Model 3                   | 0.092  | 0.119 | 0.436 | −0.046 | 0.038 | 0.800 | 0.164  | 0.028 | 0.338        |
| Cortisol (µg/dL)          |        |       |       |        |       |       |        |       |              |
| Model 0                   | −0.020 | 0.000 | 0.871 | 0.228  | 0.052 | 0.202 | −0.363 | 0.132 | <b>0.027</b> |
| Model 1                   | −0.015 | 0.032 | 0.898 | 0.195  | 0.090 | 0.277 | −0.360 | 0.132 | <b>0.035</b> |
| Model 2                   | −0.002 | 0.011 | 0.984 | 0.309  | 0.131 | 0.091 | −0.361 | 0.133 | <b>0.031</b> |
| Model 3                   | 0.009  | 0.019 | 0.944 | 0.242  | 0.058 | 0.189 | −0.365 | 0.139 | <b>0.028</b> |

$\beta$  (standardized regression coefficient),  $R^2$ , and  $p$ -value of simple and multiple-regression analysis. Significant  $p$ -values ( $< 0.05$ ) are in bold. PSQI: Pittsburgh Sleep Quality Index; DHEAS: dehydroepiandrosterone sulphate.

**Table S2.** Association of sleep quantity and quality with total testosterone, SHBG, and DHEAS/cortisol, free testosterone/cortisol, total testosterone/cortisol, and somatotropin/cortisol ratios (Model 0) adjusted by age (Model 1), by fat mass index (Model 2), and by lean mass index (Model 3).

|                                   | All     |       |              | Men     |       |       | Women   |       |       |
|-----------------------------------|---------|-------|--------------|---------|-------|-------|---------|-------|-------|
|                                   | $\beta$ | $R^2$ | $p$          | $\beta$ | $R^2$ | $p$   | $\beta$ | $R^2$ | $p$   |
| <b>Global PSQI score</b>          |         |       |              |         |       |       |         |       |       |
| Total testosterone (ng/dL)        |         |       |              |         |       |       |         |       |       |
| Model 0                           | -0.194  | 0.038 | 0.118        | 0.027   | 0.001 | 0.888 | -0.071  | 0.005 | 0.682 |
| Model 1                           | -0.247  | 0.100 | <b>0.047</b> | -0.055  | 0.046 | 0.786 | -0.085  | 0.012 | 0.631 |
| Model 2                           | -0.160  | 0.109 | 0.188        | 0.038   | 0.033 | 0.843 | -0.054  | 0.035 | 0.756 |
| Model 3                           | 0.124   | 0.466 | 0.230        | 0.275   | 0.129 | 0.219 | -0.096  | 0.011 | 0.600 |
| SHBG (nmol/L)                     |         |       |              |         |       |       |         |       |       |
| Model 0                           | 0.072   | 0.005 | 0.564        | -0.059  | 0.003 | 0.759 | -0.010  | 0.000 | 0.955 |
| Model 1                           | 0.094   | 0.015 | 0.467        | -0.166  | 0.081 | 0.409 | 0.017   | 0.024 | 0.925 |
| Model 2                           | 0.091   | 0.027 | 0.469        | -0.054  | 0.009 | 0.781 | 0.028   | 0.152 | 0.864 |
| Model 3                           | -0.054  | 0.073 | 0.688        | 0.022   | 0.017 | 0.926 | 0.012   | 0.005 | 0.947 |
| DHEAS/cortisol ratio              |         |       |              |         |       |       |         |       |       |
| Model 0                           | -0.171  | 0.029 | 0.169        | -0.128  | 0.016 | 0.502 | -0.160  | 0.026 | 0.351 |
| Model 1                           | -0.123  | 0.082 | 0.324        | -0.002  | 0.121 | 0.991 | -0.119  | 0.081 | 0.485 |
| Model 2                           | -0.163  | 0.034 | 0.197        | -0.128  | 0.016 | 0.508 | -0.150  | 0.037 | 0.389 |
| Model 3                           | -0.050  | 0.091 | 0.708        | -0.014  | 0.043 | 0.950 | -0.085  | 0.081 | 0.630 |
| Free testosterone/cortisol ratio  |         |       |              |         |       |       |         |       |       |
| Model 0                           | -0.192  | 0.037 | 0.122        | -0.101  | 0.010 | 0.597 | -0.041  | 0.002 | 0.813 |
| Model 1                           | -0.200  | 0.038 | 0.119        | -0.012  | 0.063 | 0.952 | -0.050  | 0.005 | 0.778 |
| Model 2                           | -0.171  | 0.064 | 0.169        | -0.102  | 0.011 | 0.599 | -0.024  | 0.033 | 0.891 |
| Model 3                           | 0.053   | 0.291 | 0.656        | 0.075   | 0.074 | 0.743 | -0.074  | 0.013 | 0.685 |
| Total testosterone/cortisol ratio |         |       |              |         |       |       |         |       |       |
| Model 0                           | -0.154  | 0.024 | 0.218        | -0.005  | 0.000 | 0.978 | 0.011   | 0.000 | 0.950 |
| Model 1                           | -0.178  | 0.036 | 0.165        | 0.059   | 0.028 | 0.773 | -0.011  | 0.017 | 0.948 |
| Model 2                           | -0.130  | 0.057 | 0.295        | -0.006  | 0.000 | 0.976 | 0.025   | 0.022 | 0.885 |
| Model 3                           | 0.124   | 0.350 | 0.276        | 0.210   | 0.096 | 0.355 | -0.018  | 0.008 | 0.923 |
| Somatotropin/cortisol ratio       |         |       |              |         |       |       |         |       |       |
| Model 0                           | 0.147   | 0.021 | 0.240        | 0.114   | 0.013 | 0.549 | 0.066   | 0.004 | 0.701 |
| Model 1                           | 0.147   | 0.021 | 0.254        | -0.014  | 0.122 | 0.943 | 0.074   | 0.006 | 0.679 |
| Model 2                           | 0.186   | 0.115 | 0.125        | 0.129   | 0.071 | 0.494 | 0.116   | 0.274 | 0.440 |
| Model 3                           | 0.014   | 0.096 | 0.916        | 0.020   | 0.031 | 0.932 | 0.055   | 0.006 | 0.765 |
| <b>Total sleep time</b>           |         |       |              |         |       |       |         |       |       |
| Total testosterone (ng/dL)        |         |       |              |         |       |       |         |       |       |
| Model 0                           | -0.320  | 0.103 | <b>0.007</b> | -0.017  | 0.000 | 0.927 | 0.222   | 0.049 | 0.188 |
| Model 1                           | -0.311  | 0.118 | <b>0.009</b> | -0.018  | 0.004 | 0.922 | 0.226   | 0.056 | 0.184 |
| Model 2                           | -0.301  | 0.158 | <b>0.009</b> | 0.016   | 0.056 | 0.928 | 0.204   | 0.064 | 0.231 |
| Model 3                           | -0.082  | 0.460 | 0.400        | 0.001   | 0.086 | 0.997 | 0.219   | 0.050 | 0.202 |
| SHBG (nmol/L)                     |         |       |              |         |       |       |         |       |       |
| Model 0                           | 0.344   | 0.119 | <b>0.004</b> | 0.202   | 0.041 | 0.259 | 0.165   | 0.027 | 0.329 |
| Model 1                           | 0.334   | 0.138 | <b>0.005</b> | 0.204   | 0.048 | 0.262 | 0.158   | 0.044 | 0.353 |
| Model 2                           | 0.358   | 0.147 | <b>0.002</b> | 0.209   | 0.043 | 0.255 | 0.109   | 0.183 | 0.491 |
| Model 3                           | 0.280   | 0.145 | <b>0.025</b> | 0.223   | 0.165 | 0.192 | 0.172   | 0.032 | 0.318 |
| DHEAS/cortisol ratio              |         |       |              |         |       |       |         |       |       |
| Model 0                           | -0.105  | 0.011 | 0.388        | 0.067   | 0.004 | 0.713 | -0.138  | 0.019 | 0.416 |
| Model 1                           | -0.125  | 0.086 | 0.291        | 0.074   | 0.138 | 0.665 | -0.152  | 0.086 | 0.362 |
| Model 2                           | -0.099  | 0.015 | 0.417        | 0.068   | 0.005 | 0.715 | -0.154  | 0.032 | 0.372 |
| Model 3                           | 0.024   | 0.116 | 0.845        | 0.082   | 0.075 | 0.643 | -0.112  | 0.087 | 0.502 |
| Free testosterone/cortisol ratio  |         |       |              |         |       |       |         |       |       |
| Model 0                           | -0.228  | 0.052 | 0.057        | -0.022  | 0.000 | 0.904 | 0.217   | 0.047 | 0.197 |
| Model 1                           | -0.232  | 0.055 | 0.055        | -0.016  | 0.084 | 0.929 | 0.220   | 0.051 | 0.197 |
| Model 2                           | -0.214  | 0.084 | 0.073        | -0.010  | 0.008 | 0.957 | 0.200   | 0.061 | 0.241 |
| Model 3                           | -0.037  | 0.282 | 0.741        | -0.007  | 0.061 | 0.968 | 0.211   | 0.051 | 0.218 |
| Total testosterone/cortisol ratio |         |       |              |         |       |       |         |       |       |
| Model 0                           | -0.245  | 0.060 | <b>0.041</b> | 0.015   | 0.000 | 0.933 | 0.199   | 0.039 | 0.239 |
| Model 1                           | -0.244  | 0.060 | <b>0.044</b> | 0.020   | 0.061 | 0.909 | 0.206   | 0.060 | 0.224 |
| Model 2                           | -0.231  | 0.087 | 0.053        | 0.024   | 0.004 | 0.898 | 0.185   | 0.048 | 0.280 |
| Model 3                           | -0.040  | 0.324 | 0.716        | 0.030   | 0.060 | 0.868 | 0.192   | 0.044 | 0.262 |
| Somatotropin/cortisol ratio       |         |       |              |         |       |       |         |       |       |
| Model 0                           | 0.299   | 0.090 | <b>0.012</b> | -0.031  | 0.001 | 0.862 | 0.210   | 0.044 | 0.212 |
| Model 1                           | 0.297   | 0.090 | <b>0.013</b> | -0.036  | 0.044 | 0.843 | 0.209   | 0.044 | 0.221 |
| Model 2                           | 0.318   | 0.139 | <b>0.007</b> | -0.033  | 0.001 | 0.858 | 0.150   | 0.224 | 0.332 |

|                                   |        |       |       |        |       |       |        |       |       |
|-----------------------------------|--------|-------|-------|--------|-------|-------|--------|-------|-------|
| Model 3                           | 0.194  | 0.159 | 0.112 | -0.042 | 0.031 | 0.819 | 0.207  | 0.045 | 0.228 |
| <b>Wake after sleep onset</b>     |        |       |       |        |       |       |        |       |       |
| Total testosterone (ng/dL)        |        |       |       |        |       |       |        |       |       |
| Model 0                           | 0.054  | 0.003 | 0.657 | 0.048  | 0.002 | 0.789 | -0.157 | 0.025 | 0.354 |
| Model 1                           | 0.051  | 0.024 | 0.676 | 0.063  | 0.008 | 0.737 | -0.194 | 0.040 | 0.277 |
| Model 2                           | 0.016  | 0.069 | 0.897 | -0.019 | 0.056 | 0.917 | -0.148 | 0.045 | 0.384 |
| Model 3                           | -0.022 | 0.455 | 0.805 | -0.004 | 0.086 | 0.981 | -0.161 | 0.028 | 0.350 |
| SHBG (nmol/L)                     |        |       |       |        |       |       |        |       |       |
| Model 0                           | -0.059 | 0.004 | 0.625 | 0.101  | 0.010 | 0.576 | -0.119 | 0.014 | 0.483 |
| Model 1                           | -0.056 | 0.030 | 0.646 | 0.089  | 0.014 | 0.635 | -0.086 | 0.026 | 0.629 |
| Model 2                           | -0.082 | 0.026 | 0.505 | 0.103  | 0.010 | 0.591 | -0.094 | 0.180 | 0.551 |
| Model 3                           | -0.028 | 0.078 | 0.811 | 0.041  | 0.117 | 0.814 | -0.116 | 0.016 | 0.499 |
| DHEAS/cortisol ratio              |        |       |       |        |       |       |        |       |       |
| Model 0                           | 0.057  | 0.003 | 0.638 | 0.103  | 0.011 | 0.568 | -0.113 | 0.013 | 0.504 |
| Model 1                           | 0.063  | 0.075 | 0.591 | 0.034  | 0.133 | 0.846 | -0.046 | 0.065 | 0.794 |
| Model 2                           | 0.047  | 0.008 | 0.702 | 0.112  | 0.012 | 0.558 | -0.108 | 0.021 | 0.530 |
| Model 3                           | 0.019  | 0.116 | 0.869 | 0.058  | 0.072 | 0.747 | -0.098 | 0.084 | 0.557 |
| Free testosterone/cortisol ratio  |        |       |       |        |       |       |        |       |       |
| Model 0                           | 0.084  | 0.007 | 0.489 | 0.136  | 0.019 | 0.449 | -0.184 | 0.034 | 0.275 |
| Model 1                           | 0.085  | 0.009 | 0.487 | 0.083  | 0.091 | 0.642 | -0.216 | 0.045 | 0.226 |
| Model 2                           | 0.056  | 0.041 | 0.643 | 0.122  | 0.021 | 0.524 | -0.176 | 0.053 | 0.301 |
| Model 3                           | 0.024  | 0.282 | 0.816 | 0.095  | 0.070 | 0.599 | -0.190 | 0.043 | 0.267 |
| Total testosterone/cortisol ratio |        |       |       |        |       |       |        |       |       |
| Model 0                           | 0.096  | 0.009 | 0.427 | 0.158  | 0.025 | 0.380 | -0.173 | 0.030 | 0.307 |
| Model 1                           | 0.096  | 0.010 | 0.433 | 0.115  | 0.073 | 0.527 | -0.229 | 0.066 | 0.194 |
| Model 2                           | 0.071  | 0.038 | 0.560 | 0.154  | 0.025 | 0.419 | -0.166 | 0.042 | 0.331 |
| Model 3                           | 0.033  | 0.324 | 0.747 | 0.118  | 0.073 | 0.513 | -0.178 | 0.039 | 0.297 |
| Somatotropin/cortisol ratio       |        |       |       |        |       |       |        |       |       |
| Model 0                           | -0.127 | 0.016 | 0.296 | 0.088  | 0.008 | 0.625 | -0.203 | 0.041 | 0.229 |
| Model 1                           | -0.126 | 0.018 | 0.303 | 0.133  | 0.060 | 0.466 | -0.213 | 0.042 | 0.232 |
| Model 2                           | -0.159 | 0.063 | 0.187 | 0.099  | 0.009 | 0.607 | -0.176 | 0.232 | 0.251 |
| Model 3                           | -0.088 | 0.134 | 0.446 | 0.123  | 0.044 | 0.504 | -0.207 | 0.045 | 0.227 |
| <b>Sleep efficiency</b>           |        |       |       |        |       |       |        |       |       |
| Total testosterone (ng/dL)        |        |       |       |        |       |       |        |       |       |
| Model 0                           | -0.146 | 0.021 | 0.229 | -0.063 | 0.004 | 0.729 | 0.188  | 0.035 | 0.265 |
| Model 1                           | -0.142 | 0.042 | 0.239 | -0.075 | 0.009 | 0.687 | 0.217  | 0.050 | 0.216 |
| Model 2                           | -0.105 | 0.079 | 0.380 | 0.003  | 0.055 | 0.989 | 0.178  | 0.055 | 0.294 |
| Model 3                           | -0.009 | 0.454 | 0.921 | -0.012 | 0.086 | 0.945 | 0.189  | 0.038 | 0.269 |
| SHBG (nmol/L)                     |        |       |       |        |       |       |        |       |       |
| Model 0                           | 0.135  | 0.018 | 0.266 | -0.051 | 0.003 | 0.778 | 0.144  | 0.021 | 0.396 |
| Model 1                           | 0.131  | 0.044 | 0.277 | -0.039 | 0.008 | 0.835 | 0.117  | 0.033 | 0.503 |
| Model 2                           | 0.162  | 0.045 | 0.184 | -0.049 | 0.003 | 0.800 | 0.115  | 0.184 | 0.463 |
| Model 3                           | 0.082  | 0.084 | 0.496 | 0.008  | 0.116 | 0.964 | 0.143  | 0.023 | 0.406 |
| DHEAS/cortisol ratio              |        |       |       |        |       |       |        |       |       |
| Model 0                           | -0.076 | 0.006 | 0.531 | -0.070 | 0.005 | 0.697 | 0.061  | 0.004 | 0.721 |
| Model 1                           | -0.083 | 0.078 | 0.484 | -0.011 | 0.132 | 0.950 | 0.002  | 0.063 | 0.989 |
| Model 2                           | -0.066 | 0.010 | 0.596 | -0.076 | 0.005 | 0.690 | 0.054  | 0.012 | 0.752 |
| Model 3                           | -0.008 | 0.115 | 0.948 | -0.026 | 0.069 | 0.886 | 0.056  | 0.078 | 0.738 |
| Free testosterone/cortisol ratio  |        |       |       |        |       |       |        |       |       |
| Model 0                           | -0.142 | 0.020 | 0.242 | -0.123 | 0.015 | 0.495 | 0.212  | 0.045 | 0.208 |
| Model 1                           | -0.143 | 0.022 | 0.242 | -0.078 | 0.090 | 0.664 | 0.236  | 0.055 | 0.177 |
| Model 2                           | -0.112 | 0.050 | 0.355 | -0.107 | 0.018 | 0.573 | 0.203  | 0.063 | 0.232 |
| Model 3                           | -0.035 | 0.283 | 0.739 | -0.083 | 0.068 | 0.647 | 0.214  | 0.052 | 0.209 |
| Total testosterone/cortisol ratio |        |       |       |        |       |       |        |       |       |
| Model 0                           | -0.159 | 0.025 | 0.187 | -0.139 | 0.019 | 0.440 | 0.196  | 0.039 | 0.244 |
| Model 1                           | -0.159 | 0.026 | 0.192 | -0.101 | 0.071 | 0.574 | 0.240  | 0.072 | 0.167 |
| Model 2                           | -0.133 | 0.051 | 0.275 | -0.133 | 0.020 | 0.484 | 0.189  | 0.050 | 0.268 |
| Model 3                           | -0.046 | 0.325 | 0.655 | -0.100 | 0.069 | 0.580 | 0.198  | 0.046 | 0.246 |
| Somatotropin/cortisol ratio       |        |       |       |        |       |       |        |       |       |
| Model 0                           | 0.178  | 0.032 | 0.141 | -0.091 | 0.008 | 0.614 | 0.228  | 0.052 | 0.174 |
| Model 1                           | 0.177  | 0.034 | 0.146 | -0.128 | 0.059 | 0.480 | 0.235  | 0.053 | 0.179 |
| Model 2                           | 0.216  | 0.084 | 0.073 | -0.101 | 0.010 | 0.597 | 0.198  | 0.240 | 0.195 |
| Model 3                           | 0.110  | 0.138 | 0.344 | -0.124 | 0.044 | 0.499 | 0.229  | 0.055 | 0.178 |

$\beta$  (standardized regression coefficient),  $R^2$ , and  $p$ -value of simple and multiple-regression analysis. Significant  $p$ -values (< 0.05) are in bold. PSQI: Pittsburgh Sleep Quality Index; SHBG: sex hormone binding globulin; DHEAS: dehydroepiandrosterone sulphate.
